# Supplementary material for: Assessment of some key indicators of the ecological status of an African freshwater lagoon (Lagoon Aghien, Ivory Coast)
Source: PLoS One. 2021 May 6;16(5):e0251065. doi: 10.1371/journal.pone.0251065 (PMC8101731; doi:10.1371/journal.pone.0251065)
Supplement: S5 Table — (XLSX) [file pone.0251065.s009.xlsx]

## Sheet: Feuil1
						Cyanobacteria																				Chlorophyta														Euglenozoa						Bacillariophyta
STATIONS	DATE	Aphanizomenon sp (100µm)	Aphanocapsa sp	Aphanothece sp	Chroococcus sp	Cylindrospermopsis sp (100 µm)	Dolichospermum sp	Gomphosphoeria sp	Leptolyngbya sp	Limnothrix sp	Lyngbya sp (100 µm)	Merismopodia sp	Microcystis sp (cellules)	Oscillatoria sp	Planktothrix sp (100µm)	Pseudanabaena sp (1OO µm)	Actinastrum sp	Ankistrodesmus sp (Col)	Closterium sp	Coelastum sp (col)	Cosmarium sp	Crucigenia sp	Crucigeniella sp	Dictyosphaerium sp	Euastrum sp	Eudorina sp	Golenkinia sp	Kirchneriella sp	Micractinium sp	Monoraphidium sp	Oocystis sp	Pediastrum sp (col)	Scenedesmus sp	Staurastrum sp	Staurodesmus sp	Tetrastrum sp	Tetraedron sp	Treubaria sp	Euglena sp	Lepocinclis sp	Phacus sp	Strombomonas sp	Trachelomonas sp	Aulacoseira sp	Cyclotella sp	Eunotia sp	Melosira sp	Navicula sp	Nitzschia sp
STATIONS	DATE	μm3 / ml	μm3 / ml	μm3 / ml	μm3 / ml	μm3 / ml	μm3 / ml	μm3 / ml	μm3 / ml	μm3 / ml	μm3 / ml	μm3 / ml	μm3 / ml	μm3 / ml	μm3 / ml	μm3 / ml	μm3 / ml	μm3 / ml	μm3 / ml	μm3 / ml	μm3 / ml	μm3 / ml	μm3 / ml	μm3 / ml	μm3 / ml	μm3 / ml	μm3 / ml	μm3 / ml	μm3 / ml	μm3 / ml	μm3 / ml	μm3 / ml	μm3 / ml	μm3 / ml	μm3 / ml	μm3 / ml	μm3 / ml	μm3 / ml	μm3 / ml	μm3 / ml	μm3 / ml	μm3 / ml	μm3 / ml	μm3 / ml	μm3 / ml	μm3 / ml	μm3 / ml	μm3 / ml	μm3 / ml
St1	dec-16	0	77910.9	18550.2	20246.2	746434	130594	0	10812.1	457660	532550	0	149859	154232	532550	0	0	8904.1	0	27560.3	0	0	0	194300	0	0	0	0	0	6121.57	60738.7	1.85431e+06	125929	519936	0	0	21809.8	0	0	0	1.84434e+06	0	2.30455e+06	934931	83211	0	0	0	26235.3
St2	dec-16	0	103881	0	0	1.18337e+06	121265	0	9010.11	748899	798825	0	999062	1.38809e+06	665688	0	7844.09	8904.1	7.15575e+06	55120.6	0	113633	0	0	0	525766	0	0	0	0	0	3.70861e+06	321820	866560	460204	0	43619.5	0	0	0	194141	0	3.80751e+06	1.58938e+06	0	0	3.19149e+06	0	34980.4
St3	dec-16	0	0	0	0	1.82057e+06	0	0	16218.2	615761	0	0	163639	0	266275	0	15688.2	0	4.29345e+06	110241	0	56816.7	0	0	0	0	0	0	0	0	0	0	83953	86656	0	0	21809.8	0	0	0	485353	0	5.31048e+06	0	0	0	0	0	34980.4
St4	dec-16	0	51940.6	18550.2	202462	1.63851e+06	74624.9	0	16218.2	732257	0	0	582212	1.85078e+06	266275	18762.2	0	35616.4	1.43115e+06	0	655326	284083	234793	179354	0	0	0	38160.4	0	6121.57	30369.4	3.70861e+06	251859	563264	690307	0	0	0	0	42162	97070.6	0	2.50494e+06	1.37902e+06	249633	0	0	31303.5	17490.2
St5	dec-16	0	0	0	0	1699200	117897	46375.5	2803.14	511285	0	0	81724	0	0	0	6100.96	2597.03	0	21435.8	0	22095.4	36523.3	23249.6	0	0	0	0	0	0	0	0	0	808790	536905	0	0	0	0	32792.7	75499.4	0	155863	309047	906075	0	0	0	0
St6	dec-16	0	25970.3	0	0	764640	0	0	1802.02	682330	0	0	139524	0	0	0	0	0	5.7246e+06	0	0	56816.7	0	59784.7	43116	262883	0	0	0	4081.05	0	0	41976.5	129984	460204	0	0	0	779374	42162	388283	0	0	1.33228e+06	166422	0	245499	0	26235.3
St1	jan-17	0	0	0	0	2.27571e+06	83953	0	0	815468	0	0	449578	1.54232e+06	0	0	7844.09	0	1.43115e+06	0	218442	0	0	44838.5	0	0	0	0	0	0	0	1.85431e+06	125929	736576	0	0	0	0	0	0	0	0	500988	280479	0	0	0	0	26235.3
St2	jan-17	364141	0	0	20246.2	2.40315e+06	104941	0	10812.1	1.09006e+06	0	0	2.05497e+06	462695	0	0	0	8904.1	0	0	0	0	0	0	0	0	0	0	0	0	0	0	27984.3	779904	230102	0	0	0	0	0	0	0	500988	0	0	0	0	0	8745.1
St3	jan-17	0	51940.6	0	20246.2	491554	0	0	39644.5	2.53793e+06	0	0	192922	1.07962e+06	133138	0	31376.4	0	0	0	0	0	234793	29892.4	86232	0	0	0	0	0	0	0	139922	43328	230102	0	0	0	0	0	0	0	1.20237e+06	3.92671e+06	83211	0	1.47299e+06	0	43725.5
St4	jan-17	104040	25970.3	0	0	4.49681e+06	174902	0	10812.1	1.73911e+06	0	0	2.06875e+06	1.07962e+06	0	0	0	1113.01	0	0	0	0	0	44838.5	0	0	0	0	0	0	0	5.56292e+06	27984.3	996544	230102	0	0	0	0	0	0	0	1.50297e+06	0	0	0	0	0	78705.9
St5	jan-17	208080	51940.6	0	20246.2	5734800	566683	0	16218.2	2.35487e+06	0	0	2.08597e+06	771159	0	14071.7	0	0	1.43115e+06	27560.3	0	0	0	0	0	0	0	0	0	0	0	0	0	1.55981e+06	0	0	43619.5	0	389687	0	0	0	9.71917e+06	280479	0	0	245499	0	43725.5
St6	jan-17	0	25970.3	0	20246.2	218469	116601	0	0	1.66422e+06	0	0	439243	0	0	0	0	0	1.43115e+06	82681	0	0	0	89677.1	0	131442	0	0	0	0	0	3.70861e+06	111937	519936	230102	5061.56	21809.8	0	0	0	388283	0	2.00395e+06	794691	0	0	1.10475e+06	0	78705.9
St1	feb-17	0	43283.8	0	0	5.12794e+06	6.42474e+06	596257	0	762767	0	0	5.13885e+06	1.07962e+07	0	0	0	0	2.38525e+06	137802	0	0	0	0	0	0	0	0	0	0	0	0	23320.3	288853	0	0	0	0	649478	70270	0	0	0	779109	0	0	0	0	204052
St2	feb-17	0	0	0	0	1.54749e+06	0	0	0	790504	0	0	1.27467e+06	0	0	0	7844.09	0	2.8623e+06	275603	655326	0	0	0	0	0	0	0	0	0	0	1.85431e+06	41976.5	389952	0	0	0	0	389687	210810	0	0	1.50297e+06	2.80479e+06	332844	0	3.06874e+06	31303.5	78705.9
St3	feb-17	104040	103881	0	0	1911600	179566	178877	0	1.1816e+06	0	0	2.42359e+06	1.85078e+06	1.33138e+06	0	0	0	1.43115e+06	303164	218442	28408.3	0	149462	0	0	0	0	0	0	0	0	0	1.12653e+06	460204	0	21809.8	0	0	0	0	0	1.00198e+06	560959	0	0	0	0	43725.5
St4	feb-17	0	25970.3	18550.2	40492.5	1.72954e+06	580675	59625.7	0	1.75575e+06	266275	0	3.56562e+06	1.18758e+07	266275	9381.11	0	0	1.43115e+06	27560.3	0	113633	0	59784.7	0	0	0	0	0	6121.57	0	5.56292e+06	69960.8	1.03987e+06	230102	0	0	20246.2	0	0	0	0	801581	257106	83211	0	0	0	87451
St5	feb-17	0	77910.9	0	40492.5	491554	452413	596257	10812.1	2.06363e+06	0	0	1.66051e+06	6.3235e+06	1.0651e+06	0	0	0	1.43115e+06	55120.6	0	113633	0	254085	0	0	0	0	0	0	30369.4	1.85431e+06	55968.7	1.25651e+06	230102	0	0	0	0	0	0	0	1.20237e+06	420719	166422	0	0	0	201137
St6	feb-17	0	181792	0	121477	1529280	1.87728e+06	0	0	865394	133138	0	2.59239e+06	2.15925e+07	0	0	7844.09	0	1.43115e+06	137802	0	0	0	224193	0	657208	0	0	9328.11	0	75923.4	1.85431e+06	55968.7	736576	0	0	0	0	389687	0	485353	0	1.20237e+06	3.10865e+06	83211	61056.7	490998	0	43725.5
St1	mar-17	0	238061	0	404925	1.13027e+07	777323	0	118633	485397	332844	322244	3.66036e+06	1.41379e+07	0	0	235323	7420.09	2.38525e+06	160769	0	0	0	398565	0	0	0	318004	0	20405.2	0	1.54526e+07	1.04941e+06	1.29984e+06	0	0	36349.6	0	0	0	808922	2.23133e+06	3.42342e+06	5.76541e+06	485397	0	1.71849e+07	0	109314
St2	mar-17	0	51940.6	0	0	5.27966e+06	314824	0	0	915321	0	0	1.88616e+06	7.2489e+06	0	0	0	0	1.43115e+06	110241	0	0	0	74730.9	0	0	0	0	0	0	0	3.70861e+06	41976.5	303296	460204	0	0	0	0	0	194141	0	3.00593e+06	3.0619e+06	83211	0	4.90998e+06	0	52470.6
St3	mar-17	0	25970.3	0	20246.2	4.36937e+06	149250	0	0	224670	0	0	2.11181e+06	5.55235e+06	399413	0	0	8904.1	0	110241	436884	0	0	59784.7	0	131442	0	0	0	6121.57	60738.7	1.11258e+07	27984.3	1.12653e+06	0	0	0	0	0	42162	0	0	1.70336e+06	1.68288e+06	83211	0	2.08674e+06	0	8745.1
St4	mar-17	0	0	18550.2	40492.5	8.64771e+06	60632.7	0	3604.04	998532	0	0	1.12653e+06	6.47774e+06	133138	0	0	0	2.8623e+06	0	218442	0	0	224193	0	0	0	0	0	2040.52	0	1.85431e+06	55968.7	389952	0	0	0	0	0	0	0	0	601186	1.44914e+06	83211	0	2.45499e+06	0	43725.5
St5	mar-17	364141	259703	0	20246.2	5.29786e+06	349804	0	1802.02	582477	0	0	1.22299e+06	1.07962e+06	133138	0	0	3339.04	0	248043	0	255675	0	134516	0	8215.1	0	0	0	0	0	5.56292e+06	125929	1.25651e+06	0	0	0	10123.1	0	0	194141	0	2.50494e+06	1.40473e+07	0	0	2.18494e+07	0	43725.5
St6	mar-17	52020.1	363584	0	0	3.27703e+06	557355	0	0	1.20656e+06	0	0	1.8431e+06	3.23887e+06	1.59765e+06	0	23532.3	0	0	0	0	113633	0	493224	0	657208	0	0	0	0	0	0	55968.7	736576	0	0	0	0	1.16906e+06	210810	291212	0	1.40277e+06	1.36967e+07	0	0	5.89197e+06	0	8745.1
St1	apr-17	52020.1	0	0	60738.7	1274400	0	59625.7	3604.04	3.01224e+06	0	48336.6	1.74836e+06	616927	0	0	0	17808.2	0	0	0	0	0	0	0	0	0	0	0	2040.52	0	0	111937	86656	0	0	0	0	0	0	0	0	1.40277e+06	257106	0	0	0	0	17490.2
St2	apr-17	208080	25970.3	0	0	527966	0	119251	0	3.28683e+06	0	0	1.80348e+06	925391	0	0	0	8904.1	7.15575e+06	82681	0	113633	0	0	0	0	0	0	0	30607.9	15184.7	1.85431e+06	195890	0	0	0	0	0	0	0	0	0	400791	233733	0	0	0	0	0
St3	apr-17	0	0	0	0	236674	0	0	0	2.45472e+06	0	0	2.79048e+06	462695	133138	0	0	0	2.8623e+06	27560.3	0	113633	0	0	43116	0	0	0	0	28567.3	30369.4	0	69960.8	43328	0	0	0	0	0	0	0	0	601186	397346	166422	0	0	0	0
St4	apr-17	416161	103881	0	20246.2	2.09366e+06	18656.2	0	30634.4	3.18698e+06	399413	0	1.43314e+06	308464	133138	0	0	1113.01	1.43115e+06	82681	436884	85225	0	29892.4	0	0	0	0	0	0	0	0	209882	389952	0	0	0	0	0	0	0	0	801581	373972	748899	0	0	0	43725.5
St5	apr-17	0	51940.6	0	40492.5	655406	37312.4	59625.7	0	2.16349e+06	0	0	470248	0	133138	0	0	0	4.29345e+06	0	218442	28408.3	234793	0	0	8215.1	0	0	0	8162.1	0	0	83953	173312	0	0	21809.8	0	0	42162	97070.6	0	1.60316e+06	841438	915321	0	981996	0	43725.5
St6	apr-17	0	233733	0	0	163851	37312.4	0	3604.04	1.4978e+06	0	120841	403070	308464	0	4690.56	0	0	0	27560.3	0	198858	0	0	0	0	0	0	0	0	0	0	139922	129984	0	0	0	0	0	42162	97070.6	0	1.30257e+06	537585	416055	0	0	0	69960.8
St1	may-17	52020.1	129852	0	40492.5	145646	0	0	111725	3.26187e+06	133138	24168.3	404792	1.23385e+06	266275	0	0	0	0	27560.3	0	0	187834	14946.2	43116	0	0	0	0	0	91108.1	3.70861e+06	321820	43328	0	0	0	0	0	0	194141	0	1.60316e+06	467466	0	0	0	0	34980.4
St2	may-17	52020.1	77910.9	0	0	218469	0	0	32436.4	1.54772e+06	0	0	754464	308464	0	0	0	8904.1	4.29345e+06	137802	0	56816.7	0	14946.2	0	0	0	0	0	0	0	3.70861e+06	279843	0	0	5061.56	21809.8	0	0	84324	0	0	3.00593e+06	888184	582477	0	0	0	43725.5
St3	may-17	0	0	0	0	218469	0	0	32436.4	2.07195e+06	0	0	814752	0	399413	4690.56	23532.3	0	2.8623e+06	55120.6	0	198858	0	149462	0	0	0	0	0	0	45554	7.41723e+06	181898	0	0	5061.56	0	0	0	0	291212	0	1.70336e+06	701198	915321	0	0	31303.5	34980.4
St4	may-17	104040	164479	24733.6	229457	309497	10105.5	119251	0	1.24816e+06	133138	386693	1.26605e+06	873980	710067	17198.7	13073.5	2968.03	1.43115e+06	27560.3	0	0	313057	199282	43116	0	9027.77	0	0	8162.1	0	2.47241e+06	447749	72213.3	0	0	7269.92	3374.37	0	56216	32356.9	0	1.43617e+06	179195	859847	0	40916.5	0	20405.2
St5	may-17	0	25970.3	0	0	819257	0	0	32436.4	2.80421e+06	0	0	203257	0	0	0	0	0	0	27560.3	0	28408.3	187834	119569	0	0	0	0	0	2040.52	0	0	405773	43328	0	0	0	0	0	126486	291212	0	2.50494e+06	584332	748899	0	0	0	8745.1
St6	may-17	52020.1	77910.9	0	20246.2	309497	81621	0	5406.06	1.32305e+06	0	0	680396	0	0	0	0	17808.2	0	0	0	28408.3	0	74730.9	0	0	54166.6	0	0	0	0	0	153914	43328	0	0	0	0	0	126486	97070.6	0	701384	1.12192e+06	832110	0	0	0	69960.8
St1	jun-17	52020.1	0	18550.2	101231	4.31475e+06	0	0	28832.3	740578	0	0	148137	0	0	0	0	0	0	0	0	0	281751	119569	0	0	0	0	0	4081.05	91108.1	1.85431e+06	83953	129984	0	0	0	0	0	0	0	0	2.10415e+06	607705	249633	0	0	0	17490.2
St2	jun-17	0	0	0	0	2293920	107273	0	32436.4	890357	133138	0	323834	154232	133138	0	0	8904.1	0	27560.3	0	85225	0	29892.4	0	0	0	0	0	0	0	0	83953	173312	0	0	0	0	0	0	0	0	1.30257e+06	1.16866e+06	0	0	0	0	8745.1
St3	jun-17	0	25970.3	0	0	4205520	0	0	57664.7	307881	0	0	130912	0	0	0	0	0	0	27560.3	218442	0	0	0	0	0	0	0	0	0	0	1.85431e+06	209882	0	0	0	0	0	0	0	97070.6	0	801581	140240	249633	0	0	0	26235.3
St4	jun-17	0	20199.1	0	62988.3	708000	143290	0	28031.4	698972	103551	0	175506	0	0	0	0	6925.41	0	0	0	0	0	0	0	0	0	0	0	0	0	0	54414	33699.6	0	0	0	0	606180	0	0	0	0	563556	194159	0	0	0	20405.2
St5	jun-17	104040	0	0	20246.2	2.14827e+06	0	0	43248.5	948605	0	0	196367	1.07962e+06	0	0	0	0	4.29345e+06	0	218442	28408.3	46958.6	59784.7	0	0	27083.3	0	6996.08	0	0	1.85431e+06	265851	259968	460204	0	0	0	0	0	0	0	1.80356e+06	864811	166422	0	0	0	34980.4
St6	jun-17	0	129852	0	0	1.36543e+06	0	0	0	624082	0	0	189477	462695	399413	0	0	0	4.29345e+06	0	0	0	0	0	0	0	0	0	0	6121.57	0	0	55968.7	43328	0	0	0	0	0	42162	0	0	1.60316e+06	537585	0	0	736497	0	26235.3
St1	jul-17	52020.1	51940.6	0	40492.5	345909	629647	0	3604.04	166422	0	0	444410	154232	0	0	0	0	1.43115e+06	27560.3	0	142042	46958.6	44838.5	0	0	0	0	0	12243.1	30369.4	0	139922	129984	0	0	0	0	0	0	291212	0	0	2.52431e+06	0	0	2.20949e+06	0	8745.1
St2	jul-17	0	0	0	40492.5	91028.6	830202	0	0	174743	0	0	63733.3	0	0	0	0	8904.1	1.43115e+06	82681	218442	85225	0	44838.5	0	0	0	0	0	10202.6	15184.7	1.85431e+06	167906	43328	0	5061.56	21809.8	0	1.55875e+06	0	0	0	2.00395e+06	2.38407e+06	332844	0	0	0	8745.1
St3	jul-17	0	25970.3	0	0	5.75301e+06	0	0	0	232991	0	0	242875	154232	0	0	0	0	1.43115e+06	0	0	142042	0	59784.7	0	0	0	0	0	20405.2	15184.7	3.70861e+06	83953	129984	0	0	0	0	0	0	97070.6	0	2.00395e+06	2.26721e+06	83211	0	4.05073e+06	0	8745.1
St4	jul-17	0	20199.1	0	31494.1	212400	984893	0	2803.14	103551	0	0	200961	0	0	3648.21	6100.96	0	1.11312e+06	0	0	22095.4	0	0	0	0	0	0	0	17457.8	23620.6	0	119711	0	0	0	0	0	0	0	0	0	1.55863e+06	818065	388318	0	3.91434e+06	0	20405.2
St5	jul-17	0	25970.3	0	40492.5	182057	3.06895e+06	0	0	108174	0	0	351394	0	0	0	23532.3	0	2.8623e+06	0	0	0	0	119569	0	0	0	0	0	8162.1	15184.7	0	125929	43328	0	0	0	20246.2	779374	42162	194141	0	7.21423e+06	0	83211	0	0	31303.5	34980.4
St6	jul-17	0	0	0	60738.7	145646	638976	0	0	166422	0	0	272158	0	0	0	7844.09	0	0	27560.3	0	28408.3	0	0	0	0	0	0	0	0	15184.7	1.85431e+06	167906	43328	0	5061.56	0	0	0	42162	97070.6	0	2.50494e+06	818065	0	0	2.82324e+06	0	8745.1
St1	aug-17	416161	129852	0	0	1.72954e+06	851190	119251	0	1.34802e+06	0	0	1.90683e+06	462695	266275	0	15688.2	0	1.43115e+06	27560.3	0	28408.3	0	254085	0	262883	0	0	4664.05	2040.52	136662	1.85431e+06	223875	1.68979e+06	230102	0	0	0	0	0	97070.6	0	2.00395e+06	1.29722e+07	249633	0	4.90998e+06	0	43725.5
St2	aug-17	104040	259703	0	0	764640	529370	0	1802.02	632403	0	0	2.60962e+06	3.08464e+06	0	0	23532.3	0	0	192922	218442	511350	0	149462	0	131442	0	0	0	0	60738.7	1.85431e+06	167906	433280	0	0	21809.8	0	389687	0	485353	0	1.50297e+06	7.85342e+06	0	0	1.09247e+07	0	8745.1
St3	aug-17	208080	77910.9	0	0	3.36806e+06	132926	0	21624.3	2.5629e+06	0	0	987004	0	0	0	0	0	0	55120.6	0	56816.7	0	104623	0	0	0	0	0	6121.57	0	0	41976.5	866560	0	0	0	0	0	0	194141	0	1.00198e+06	3.36575e+06	0	0	4.66448e+06	0	131177
St4	aug-17	0	103881	0	60738.7	546171	272847	0	0	1.27313e+06	399413	0	2.48732e+06	462695	0	0	0	2226.03	5.7246e+06	0	0	0	0	119569	0	0	0	0	0	2040.52	182216	1.85431e+06	181898	1.25651e+06	0	0	0	0	0	0	485353	0	1.80356e+06	4.48767e+06	499266	0	5.89197e+06	0	87451
St5	aug-17	0	129852	0	20246.2	582583	244863	178877	0	1.78071e+06	0	0	3.25556e+06	1.07962e+06	1.0651e+06	0	0	0	2.8623e+06	55120.6	218442	0	0	74730.9	0	0	0	0	0	0	0	5.56292e+06	69960.8	909888	0	0	0	20246.2	389687	0	97070.6	0	5.21028e+06	677825	0	0	0	0	26235.3
St6	aug-17	0	121195	0	0	148680	0	0	0	29123.8	0	0	323547	0	310654	0	18302.9	0	0	160769	0	33143.1	0	0	50302	0	0	0	0	0	0	4.32671e+06	32648.4	353845	268453	0	0	0	0	49189	0	0	935178	1.81338e+07	291238	0	1.38911e+07	0	0
St1	sep-17	78030.2	38955.5	0	0	682714	25652.3	0	0	104014	199706	0	763076	462695	66568.8	0	0	0	3.57787e+06	0	0	0	117396	29892.4	21558	0	0	0	2332.03	4081.05	53146.4	927153	62964.7	194976	0	0	10904.9	0	0	21081	48535.3	0	500988	969991	41605.5	0	0	0	17490.2
St2	sep-17	0	129852	0	80985	364114	30316.4	0	0	391092	0	0	990449	771159	0	0	0	0	0	137802	0	142042	0	0	43116	0	0	0	0	4081.05	151847	0	293835	303296	0	0	21809.8	0	0	0	0	0	1.10217e+06	2.12697e+06	83211	0	1.84124e+06	0	96196.1
St3	sep-17	0	77910.9	0	0	691817	0	0	7208.08	99853.2	0	0	525369	0	0	0	7844.09	0	2.8623e+06	0	0	0	0	29892.4	0	0	0	0	0	2040.52	0	0	55968.7	259968	0	5061.56	0	0	389687	0	291212	0	1.50297e+06	0	0	0	0	0	52470.6
St4	sep-17	0	0	0	20246.2	3.91423e+06	275179	0	99111.2	2.57954e+06	133138	0	370342	0	0	0	0	1113.01	1.43115e+06	0	0	113633	281751	0	0	0	0	0	0	2040.52	45554	0	153914	216640	0	0	0	0	389687	0	0	0	1.20237e+06	607705	332844	0	0	0	87451
St5	sep-17	86700.2	216419	6183.41	107980	952766	9328.11	0	1201.35	99853.2	88758.4	40280.5	2.3254e+06	514106	88758.4	1563.52	13073.5	1484.02	1.43115e+06	18373.5	72814	113633	751337	418493	0	0	9027.77	0	0	14283.7	25307.8	3.09051e+06	485062	288853	0	0	0	10123.1	0	0	32356.9	0	968578	2.36849e+06	499266	0	3.76432e+06	0	43725.5
St6	sep-17	0	77910.9	0	20246.2	400526	0	0	0	99853.2	0	0	1.5606e+06	616927	665688	0	0	0	0	27560.3	218442	227267	0	0	0	0	0	0	0	2040.52	167031	0	27984.3	173312	0	0	0	0	389687	84324	0	1.78506e+06	2.50494e+06	1.44914e+06	83211	0	0	0	34980.4
St1	oct-17	676261	77910.9	0	101231	892080	860518	0	0	33284.4	0	0	2.90934e+06	462695	1.73079e+06	0	15688.2	0	2.8623e+06	0	0	0	0	44838.5	0	0	0	0	0	0	0	1.66888e+07	55968.7	693248	230102	0	0	0	0	0	97070.6	0	1.00198e+06	5.14212e+06	166422	0	3.06874e+06	0	8745.1
St2	oct-17	260101	51940.6	0	0	2.89471e+06	265851	0	21624.3	2.75428e+06	0	0	732071	0	0	0	0	0	0	110241	0	85225	0	0	0	0	0	0	0	8162.1	0	0	41976.5	86656	230102	0	0	0	389687	0	0	0	801581	0	0	0	0	0	26235.3
St3	oct-17	260101	25970.3	0	0	3.67755e+06	727593	0	5406.06	1.26481e+06	0	0	552929	0	0	0	0	0	0	0	0	0	0	59784.7	0	0	0	0	0	16324.2	0	0	83953	129984	0	0	0	0	0	0	0	0	100198	163613	0	0	0	31303.5	34980.4
St4	oct-17	1.09242e+06	25970.3	18550.2	0	2.2211e+06	228539	0	66674.8	2.95399e+06	0	0	742406	0	0	0	0	0	0	0	0	0	0	0	0	0	0	0	0	10202.6	0	0	55968.7	173312	0	0	0	0	0	0	0	0	1.30257e+06	0	0	0	0	0	34980.4
St5	oct-17	0	129852	18550.2	20246.2	1.36543e+06	263519	0	0	74889.9	0	0	2.7457e+06	308464	931963	0	23532.3	0	0	55120.6	0	0	46958.6	74730.9	0	0	0	0	0	0	30369.4	3.70861e+06	83953	259968	0	0	0	0	0	0	388283	0	1.00198e+06	4.27731e+06	0	0	8.83796e+06	0	87451
St6	oct-17	936362	233733	0	20246.2	546171	23320.3	0	0	141459	0	0	1.97918e+06	1.07962e+06	532550	0	47064.6	62328.7	1.43115e+06	27560.3	218442	340900	0	74730.9	0	788649	0	0	2332.03	0	0	7.41723e+06	153914	693248	230102	0	0	0	1.16906e+06	0	194141	892531	1.50297e+06	1.56133e+07	332844	0	1.10475e+07	0	34980.4
St1	nov-17	0	20199.1	28855.9	0	481440	0	0	4204.72	1.10671e+06	0	0	140672	0	0	0	0	6925.41	0	0	0	0	0	46499.2	0	0	0	0	0	1587.07	23620.6	1.44224e+06	65296.8	168498	0	0	0	0	606180	0	0	0	545521	2.7996e+06	388318	0	0	0	13603.5
St2	nov-17	0	25970.3	0	0	345909	0	0	158578	2.42144e+06	0	0	129189	0	0	0	15688.2	0	0	0	218442	113633	0	44838.5	0	131442	0	0	0	2040.52	30369.4	1.85431e+06	181898	259968	0	0	0	0	389687	42162	0	0	2.00395e+06	1.98673e+06	0	76320.9	859246	0	61215.7
St3	nov-17	0	103881	0	40492.5	5.82583e+06	202886	0	0	1.08174e+06	0	0	1.19715e+06	5.39811e+06	133138	0	0	8904.1	0	55120.6	0	0	0	89677.1	0	0	0	0	0	10202.6	136662	1.66888e+07	41976.5	563264	460204	0	21809.8	0	0	0	388283	0	500988	2.10359e+06	0	76320.9	859246	0	26235.3
St4	nov-17	0	25970.3	37100.4	20246.2	9.13927e+06	715932	0	1802.02	682330	665688	0	1.45036e+06	1.40351e+07	399413	0	15688.2	0	0	27560.3	0	0	0	59784.7	0	0	0	0	0	0	91108.1	1.85431e+06	41976.5	346624	0	0	0	0	779374	0	0	0	1.60316e+06	2.3607e+06	416055	0	3.31424e+06	0	43725.5
St5	nov-17	0	51940.6	0	20246.2	364114	0	0	16218.2	1.34802e+06	0	0	51675.6	0	0	0	0	0	0	55120.6	0	0	375668	29892.4	0	0	0	0	0	2040.52	0	0	111937	173312	0	0	43619.5	0	0	0	0	0	2.30455e+06	3.92671e+06	83211	0	2.45499e+06	31303.5	34980.4
St6	nov-17	0	207762	0	40492.5	1.82057e+06	0	0	0	1.87225e+06	0	48336.6	120576	616927	0	0	7844.09	0	0	192922	0	0	0	104623	0	131442	0	0	0	18364.7	15184.7	1.85431e+06	195890	129984	0	0	0	0	3.50718e+06	0	0	0	3.10613e+06	4.79152e+06	0	0	1.71849e+06	0	43725.5
St1	dec-17	0	0	0	20246.2	6372000	0	0	34238.4	2.70436e+06	0	0	172252	0	0	0	0	8904.1	1.43115e+06	0	0	28408.3	187834	74730.9	0	0	0	0	0	4081.05	0	1.85431e+06	69960.8	129984	0	0	0	0	0	42162	0	0	701384	257106	83211	0	0	0	17490.2
St2	dec-17	60690.1	45448	0	0	5554260	81621	0	0	1.64064e+06	0	0	663170	179937	155327	0	0	0	0	48230.6	127425	0	0	34874.4	0	76674.2	0	0	0	0	70861.8	1.08168e+06	57134.7	985712	0	0	12722.4	0	0	24594.5	0	0	993627	0	48539.7	0	0	0	10202.6
St3	dec-17	0	0	0	0	5.38889e+06	198222	0	0	399413	0	0	408237	0	0	0	7844.09	0	1.43115e+06	27560.3	0	0	187834	0	0	131442	0	0	0	0	0	1.85431e+06	41976.5	1.12653e+06	230102	0	21809.8	0	1.16906e+06	42162	388283	0	7.01384e+06	1.79974e+06	0	45792.5	0	0	61215.7
St4	dec-17	0	25970.3	0	40492.5	6.77253e+06	0	0	0	782183	0	0	1.2471e+06	0	266275	0	0	0	0	27560.3	0	0	0	0	0	0	0	0	0	0	0	3.70861e+06	27984.3	259968	230102	0	0	0	389687	0	194141	0	2.10415e+06	0	83211	0	0	0	17490.2
St5	dec-17	0	0	0	37961.7	5655150	0	0	9010.11	509667	0	0	85049.4	0	0	0	0	0	0	0	0	0	58698.2	0	0	0	0	0	0	0	0	0	61215.7	54160	0	0	0	6326.95	0	26351.2	60669.2	0	751483	0	0	0	0	0	5465.69
St6	dec-17	0	0	0	0	3.14959e+06	454745	0	0	1.24816e+06	0	0	862983	1.85078e+06	266275	0	23532.3	0	0	0	0	85225	0	0	0	131442	0	0	0	0	30369.4	3.70861e+06	69960.8	476608	0	0	0	0	779374	0	0	0	3.30652e+06	560959	166422	0	0	0	0
St1	jan-18	0	0	0	0	276120	0	0	336377	5.58207e+06	0	0	170817	179937	0	0	0	10388.1	0	0	0	0	219140	52311.6	0	0	0	0	0	9522.45	35430.9	0	179566	505493	0	0	0	0	454635	49189	0	0	1.40277e+06	245419	291238	0	0	0	71418.3
St2	jan-18	0	0	0	0	182057	0	0	72080.8	3.70289e+06	0	0	24115.3	2.15925e+06	0	0	0	0	1.43115e+06	0	0	56816.7	0	0	0	0	0	0	0	0	30369.4	0	69960.8	173312	0	0	21809.8	0	389687	0	97070.6	0	1.50297e+06	93493.1	0	0	0	0	8745.1
St3	jan-18	0	51940.6	0	0	236674	9328.11	0	27030.3	3.26187e+06	0	0	93016.1	1.38809e+06	0	0	0	0	0	0	0	56816.7	187834	59784.7	0	0	0	0	0	0	0	3.70861e+06	167906	259968	0	0	0	0	0	42162	0	0	1.10217e+06	93493.1	0	0	0	31303.5	26235.3
St4	jan-18	40460.1	0	0	0	623040	0	0	29433	2.31696e+06	0	0	202300	119958	0	0	6100.96	0	0	0	0	66286.1	0	0	0	0	0	0	1813.8	9522.45	0	0	141476	202197	0	0	0	0	0	0	0	0	779315	309047	129439	0	0	0	34008.7
St5	jan-18	0	0	0	0	382320	0	0	118933	4.46843e+06	0	0	134357	616927	0	0	0	2226.03	0	0	0	0	46958.6	44838.5	0	0	0	0	0	2040.52	0	0	209882	216640	0	0	0	0	0	0	0	0	2.10415e+06	0	0	0	0	0	43725.5
St6	jan-18	0	0	0	0	236674	0	0	0	2.00538e+06	0	0	31005.4	0	0	0	0	8904.1	0	27560.3	0	113633	0	104623	0	131442	0	0	0	4081.05	0	0	13992.2	43328	0	0	0	0	0	0	0	0	1.10217e+06	46746.6	0	0	0	0	0
St1	feb-18	17340	43283.8	0	94482.4	6626880	3109.37	0	0	1.4978e+06	88758.4	0	2.07334e+06	3.90721e+06	532550	0	0	8904.1	0	36747.1	72814	0	0	184336	0	2.71646e+06	0	0	0	0	25307.8	8.03533e+06	107273	722133	0	0	14539.8	0	259791	0	161784	0	1.50297e+06	3.70856e+06	277370	0	1.51391e+06	0	32065.4
St2	feb-18	0	25970.3	0	0	6.55406e+06	116601	0	0	815468	399413	0	1.77247e+06	3.54733e+06	266275	0	0	0	1.43115e+06	0	0	397717	0	0	0	1.5773e+06	0	0	0	0	91108.1	5.56292e+06	125929	606592	460204	5061.56	43619.5	0	0	42162	194141	0	3.10613e+06	0	0	0	0	0	17490.2
St3	feb-18	0	25970.3	0	0	3.84141e+06	349804	0	0	1.28977e+06	0	0	2.08769e+06	3.54733e+06	133138	0	7844.09	0	1.43115e+06	0	655326	28408.3	0	74730.9	0	525766	0	0	4664.05	0	0	0	55968.7	259968	0	0	109049	0	0	168648	97070.6	0	400791	163613	0	0	0	0	8745.1
St4	feb-18	0	25970.3	0	0	7.37331e+06	494390	0	0	1.35634e+06	532550	0	1.28845e+06	6.16927e+06	266275	0	0	0	1.43115e+06	55120.6	0	0	0	508170	0	0	0	0	6996.08	0	30369.4	5.56292e+06	55968.7	389952	230102	0	43619.5	0	0	0	0	0	2.20435e+06	1.51926e+06	83211	0	2.45499e+06	0	17490.2
St5	feb-18	0	51940.6	0	0	1.96622e+06	202886	0	18020.2	607440	0	0	2.77154e+06	2.77617e+06	399413	0	0	0	1.43115e+06	0	0	0	0	0	0	131442	0	0	0	2040.52	0	1.85431e+06	0	346624	230102	0	0	0	0	0	0	0	100198	2.22046e+06	83211	0	0	0	26235.3
St6	feb-18	156060	51940.6	0	0	2.11186e+06	265851	0	0	58247.7	0	0	769967	2.77617e+06	0	0	0	0	0	192922	0	56816.7	0	74730.9	0	0	0	0	4664.05	10202.6	91108.1	1.85431e+06	13992.2	216640	0	5061.56	0	0	0	0	388283	0	1.00198e+06	5.46935e+06	166422	976907	859246	0	17490.2
St1	mar-18	0	51940.6	0	20246.2	1.11055e+06	23320.3	0	16218.2	1.83064e+06	0	120841	272158	925391	133138	0	7844.09	1113.01	0	0	655326	56816.7	93917.1	224193	0	0	0	0	0	0	60738.7	0	181898	86656	0	0	0	0	389687	0	0	0	2.00395e+06	1.16866e+06	83211	0	368248	0	34980.4
St2	mar-18	0	25970.3	0	40492.5	91028.6	0	0	115329	2.29662e+06	0	0	105074	0	0	0	15688.2	0	1.43115e+06	82681	218442	56816.7	0	74730.9	0	0	0	0	0	16324.2	30369.4	0	83953	216640	230102	0	0	0	0	0	0	0	1.30257e+06	631078	0	0	736497	0	17490.2
St3	mar-18	0	51940.6	0	60738.7	782846	0	0	109923	2.48801e+06	0	0	93016.1	1.23385e+06	399413	0	0	0	1.43115e+06	55120.6	0	28408.3	140876	29892.4	0	131442	0	0	0	0	0	3.70861e+06	181898	129984	0	0	0	0	0	42162	0	0	1.30257e+06	911558	0	0	0	0	69960.8
St4	mar-18	0	64925.8	0	151847	1.16061e+06	40810.5	0	67575.8	1.71623e+06	665688	0	1.14978e+06	192790	665688	0	0	0	1.78894e+06	68900.8	546105	142042	0	93413.6	0	0	0	0	0	0	113885	0	227373	108320	0	0	0	0	0	0	0	0	2.37969e+06	2.39576e+06	520069	0	0	0	120245
St5	mar-18	0	25970.3	0	0	218469	0	0	23426.3	2.06363e+06	0	0	282493	0	0	0	7844.09	0	0	0	0	28408.3	328710	0	43116	0	0	0	0	0	0	0	223875	346624	0	0	0	0	0	0	97070.6	0	400791	2.22046e+06	0	0	736497	0	61215.7
St6	mar-18	0	81157.2	0	0	227571	0	0	0	951726	0	0	37680.1	0	0	0	0	5565.07	0	0	136526	17755.2	58698.2	0	0	0	16927.1	0	0	5101.31	0	0	104941	0	0	3163.47	0	0	1.46133e+06	0	60669.2	0	626235	2.51263e+06	52006.9	95401.1	2.68514e+06	0	16397.1
St1	apr-18	0	10821	0	151847	2.20744e+06	5830.07	0	79589.3	3.33191e+06	388318	161122	1.44189e+06	1.221e+06	55474	0	0	0	0	22966.9	0	236736	0	0	0	0	0	0	0	13603.5	25307.8	4.63577e+06	588837	108320	767007	0	0	0	0	0	0	0	626235	525899	346712	0	255728	0	65588.3
St2	apr-18	0	51940.6	0	0	1.54749e+06	233203	0	72080.8	2.67939e+06	0	0	299719	616927	0	0	0	8904.1	0	55120.6	0	255675	0	0	86232	0	0	0	0	0	30369.4	1.85431e+06	139922	0	0	0	0	0	0	0	97070.6	0	1.60316e+06	794691	0	0	0	0	8745.1
St3	apr-18	0	0	0	0	2.18469e+06	81621	119251	18020.2	1.45619e+06	0	0	316944	154232	0	0	0	0	1.43115e+06	55120.6	0	0	187834	0	0	0	0	0	0	2040.52	0	0	167906	86656	0	0	0	0	0	42162	0	0	1.50297e+06	420719	83211	0	0	0	78705.9
St4	apr-18	0	0	46375.5	101231	3.57287e+06	201137	0	27030.3	2.08027e+06	166422	0	338045	771159	166422	0	0	1391.27	0	34450.4	0	0	234793	37365.4	161685	0	0	0	0	2550.66	0	0	139922	379120	0	0	0	0	0	0	0	0	375741	788848	0	0	153437	0	76519.7
St5	apr-18	0	25970.3	0	20246.2	2.74906e+06	95613.1	0	19822.2	2.77925e+06	0	0	113686	616927	0	0	0	8904.1	0	55120.6	0	0	187834	0	129348	131442	0	0	0	4081.05	15184.7	0	139922	129984	0	5061.56	0	0	0	0	97070.6	0	500988	1.19204e+06	0	0	0	0	26235.3
St6	apr-18	52020.1	103881	0	0	1.00131e+06	349804	0	0	1.12335e+06	0	0	60288.2	154232	0	4690.56	0	0	0	110241	0	227267	0	44838.5	0	0	0	0	0	6121.57	75923.4	1.85431e+06	111937	43328	0	0	0	0	0	0	0	0	601186	911558	332844	61056.7	1.59574e+06	0	8745.1
[truncated: 4 more columns]
